# Supplementary material for: Quantitative Accuracy and Precision in Multiplexed Single-Cell Proteomics
Source: PubMed Central journal article supplement (PMC8829824; doi:10.1021/acs.analchem.1c04174), 2021-12-30
Supplement: ac1c04174_si_001.pdf [file ac1c04174_si_001.pdf]

# Supporting Information

## **Quantitative accuracy and precision in multiplexed single-cell proteomics.**

### Authors:

Claudia Ctortecka<sup>1,\*</sup>, Karel Stejskal<sup>1,2,3</sup>, Gabriela Krššáková<sup>1,2,3</sup>, Sasha Mendjan<sup>2</sup> and Karl Mechtler<sup>1,2,3,\*</sup>.

### Affiliations:

- 1 Research Institute of Molecular Pathology (IMP), Vienna BioCenter (VBC), Campus-Vienna-Biocenter 1, 1030 Vienna, Austria.
- 2 Institute of Molecular Biotechnology of the Austrian Academy of Sciences (IMBA), Vienna BioCenter (VBC), Dr. Bohr-Gasse 3, 1030 Vienna, Austria.
- 3 The Gregor Mendel Institute of Molecular Plant Biology of the Austrian Academy of Sciences (GMI), Vienna BioCenter (VBC), Dr. Bohr-Gasse 3, 1030 Vienna, Austria.

### \* Correspondence:

Claudia Ctortecka

[Claudia.ctortecka@imp.ac.at](mailto:Claudia.ctortecka@imp.ac.at)

Karl Mechtler

[Karl.mechtler@imp.ac.at](mailto:Karl.mechtler@imp.ac.at)

### Table of Content:

Figure S1: *Re-analysis of public SCoPE data.*

Figure S2: *Ratio compression for SCoPE, TMT10-plex and TMTpro samples at various carrier spikes.*

Figure S3: *Measurement stability, RI variability and quantification accuracy at various carrier ratios.*

Figure S4: *Measurement stability and variance of public SCoPE data.*

Figure S5: *Measurement stability and accuracy of TMT<sub>zero</sub> experiments.*

Figure S6: *Ratio compression in DIA-TMT experiments.*

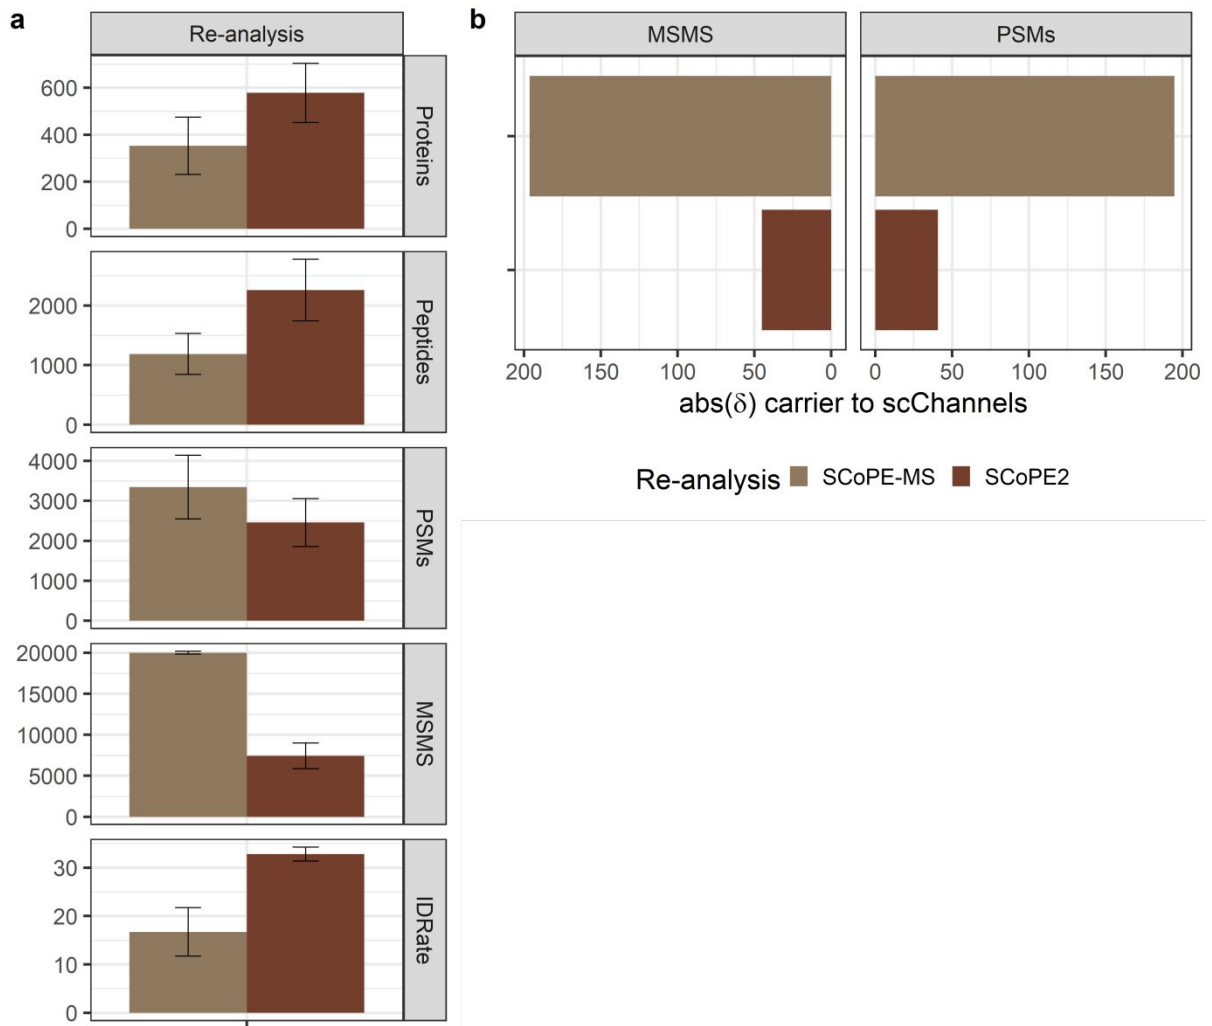

**Figure S1: Re-analysis of public single cell data, (a)** Identified proteins, peptide groups, PSMs, number of MS/MS scans, ID-rates and **(b)** delta between expected and acquired carrier to single cell ratio across all MS/MS scans or PSMs of published SCoPE-MS (light brown) and SCoPE2 (dark brown). Median and median absolute deviation (mad) is shown.

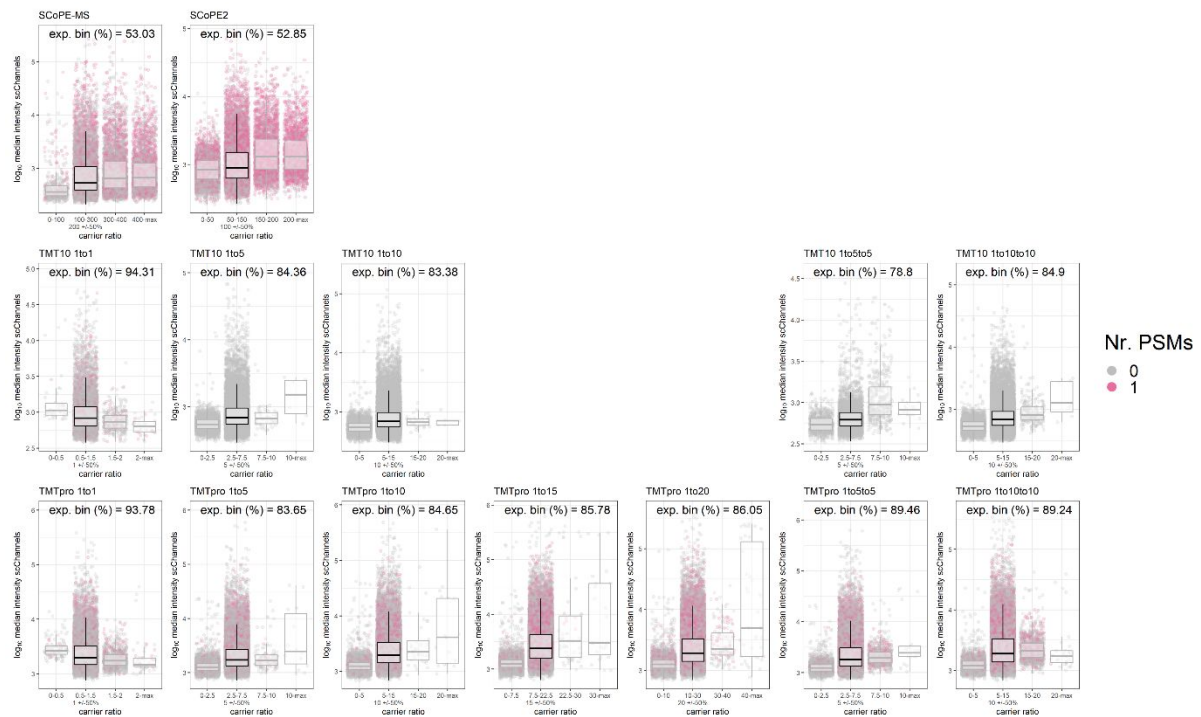

**Figure S2: Ratio compression for SCoPE, TMT10-plex and TMTpro samples at various carrier spikes.** Log<sub>10</sub> median RI intensity of all MS/MS scans and binned ratios between ‘single cells’ and the carrier is displayed. Identified and unidentified MS/MS scans are indicated in grey or pink, respectively. The expected bin (carrier +/- 50 %) is highlighted in black, and the percent of MS/MS scans within those is indicated.

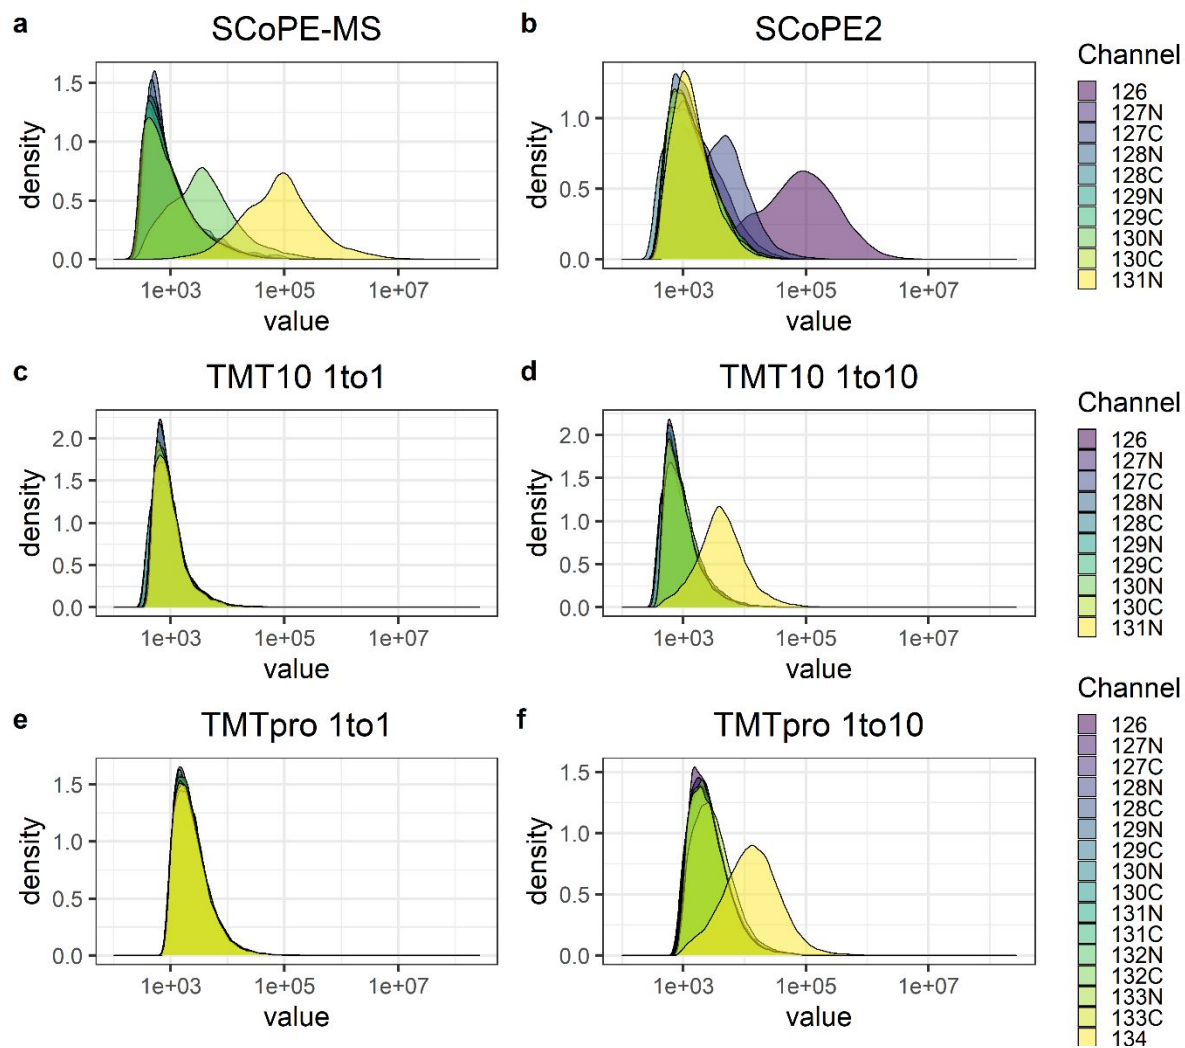

*Figure S3: Measurement stability and RI variability at various carrier ratios. RI intensity distributions based on all MS/MS scans for (a-b) SCoPE, (c-d) TMT10-plex and (e-f) TMTpro experiments at indicated carrier spikes.*

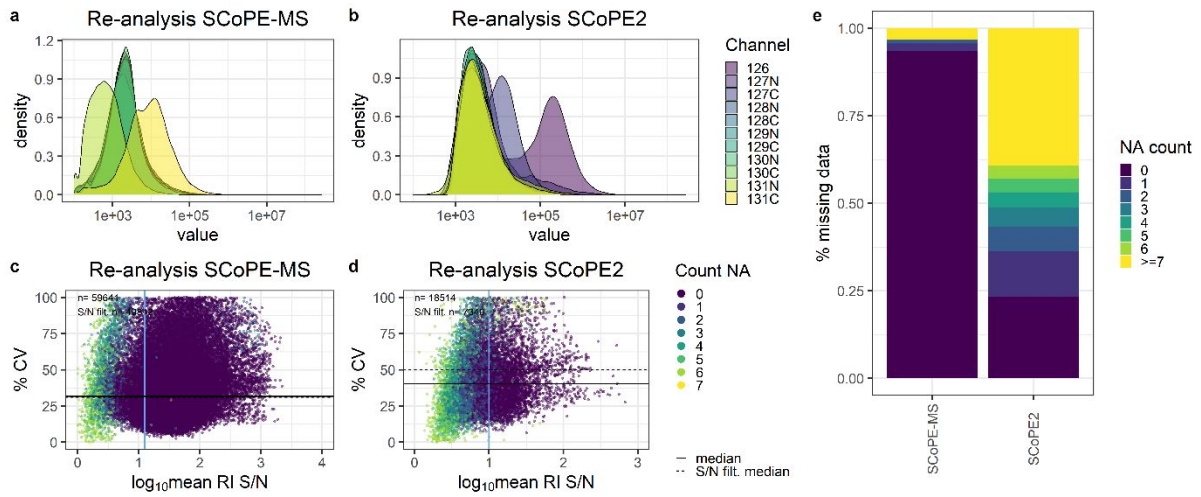

**Figure S4: Measurement stability and variance of public SCoPE-MS and SCoPE2 data. (a-b)** RI intensity distributions based on all MS/MS scans and **(c-d)** percent CV across 'single cell' channels and log<sub>10</sub> mean RI S/N for publicly available SCoPE data. The horizontal solid line and dashed lines indicate median S/N across all MS/MS scans or post-S/N filtering, respectively. The vertical blue line specifies the S/N filter cut-off. Colors reflect the number of missing 'single cell' RIs per MS/MS scan. **(e)** Percent missing quantitative data in publicly available SCoPE data per PSM.

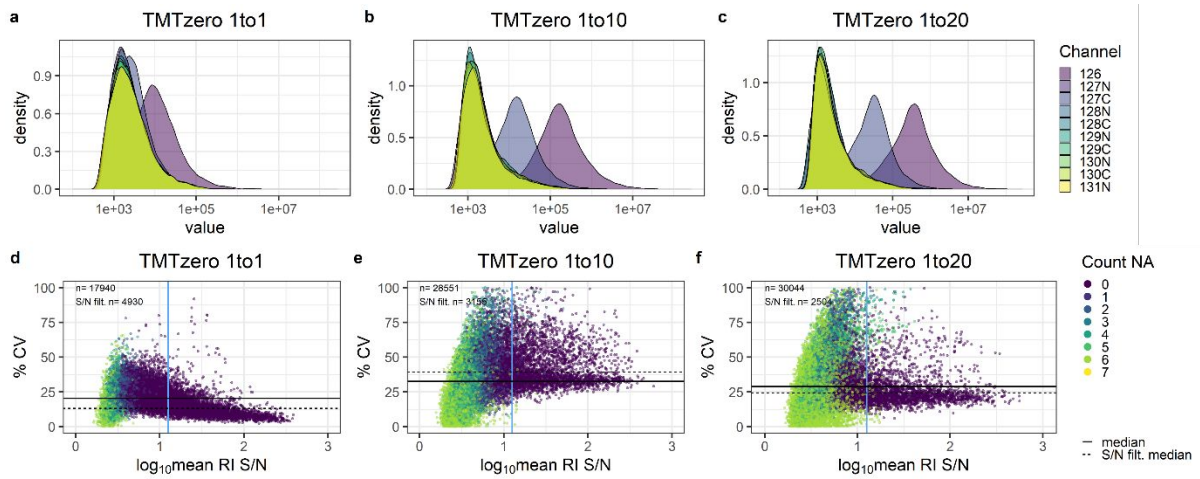

**Figure S5: Measurement accuracy of  $TMT_{zero}$  experiments. (a-c)** RI intensity distribution across all MS/MS scans in  $TMT_{zero}$  experiments. Colors indicate different TMT channels. **(d-f)** Median percent CV and  $\log_{10}$  mean RI S/N at indicated  $TMT_{zero}$  carrier spikes. Horizontal solid and dashed lines indicate median S/N across all MS/MS scans or post-S/N filtering, respectively. The vertical blue line indicates the S/N filter cut-off. Colors indicate the number of missing 'single cell' RIs per MS/MS scan.

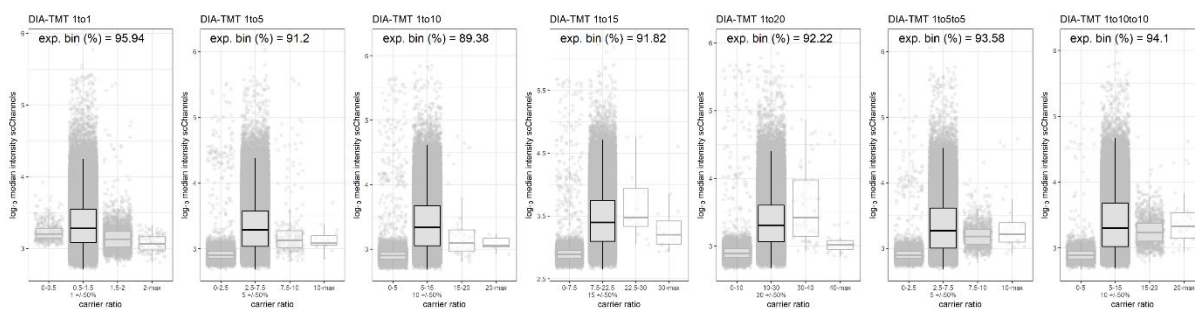

**Figure S6: Ratio compression in DIA-TMT experiments.** Log<sub>10</sub> median RI intensity across all MS/MS scans is displayed with binned ‘single cell’ to carrier channels ratios. The expected ratio (carrier +/- 50%) is highlighted in black, and percent of MS/MS scans within this bin is indicated.
